# Supplementary material for: Probiotic Potential and Cholesterol-Lowering Capabilities of Bacterial Strains Isolated from Pericarpium Citri Reticulatae ‘Chachiensis’
Source: MDPI journal article supplement (doi:10.3390/microorganisms9061224), 2021-06-04
Supplement: s1 [file s1]

|        |                                     |        |             |         |   |     |     |
|--------|-------------------------------------|--------|-------------|---------|---|-----|-----|
| N17-10 | <i>Bacillus velezensis</i>          | 98.95% | MH261042.1  | LB      | + | N/A | N/A |
| N17-11 | <i>Bacillus aryabhatai</i>          | 99.79% | KR063195.1  | LB      | + | N/A | N/A |
| N17-12 | <i>Bacillus megaterium</i>          | 99.93% | MK521052.1  | LB      | - | +   | -   |
| N16-13 | <i>Bacillus firmus</i>              | 99.85% | FJ613310.1  | LB      | + | N/A | N/A |
| N16-14 | <i>Bacillus aquimaris</i>           | 100%   | EU835730.1  | LB      | + | N/A | N/A |
| N16-16 | <i>Bacillus altitudinis</i>         | 100%   | MN710447.1  | LB      | + | N/A | N/A |
| N16-17 | <i>Paenibacillus illinoisensis</i>  | 99.58% | NR_113828.1 | LB      | + | N/A | N/A |
| N16-18 | <i>Bacillus sporothermodurans</i>   | 100%   | MN904954.1  | LB      | + | N/A | N/A |
| N15-19 | <i>Bacillus amyloliquefaciens</i>   | 100%   | GQ853414.1  | LB      | + | N/A | N/A |
| N15-20 | <i>Bacillus subtilis</i>            | 100%   | MH100679.1  | LB      | - | +   | +   |
| N15-21 | <i>Quasibacillus thermotolerans</i> | 100%   | MG651240.1  | Elliker | - | +   | +   |
| N15-22 | <i>Lactobacillus senioris</i>       | 100%   | MW578443.1  | MRS     | - | +   | -   |
| N16-23 | <i>Bhargavaea cecembensis</i>       | 99.86% | JQ071510.1  | Elliker | + | N/A | N/A |
| N16-24 | <i>Terribacillus saccharophilus</i> | 99.93% | NR_041356.1 | Elliker | + | N/A | N/A |
| N16-25 | <i>Paenibacillus lautus</i>         | 97.16% | MT510152.1  | LB      | + | N/A | N/A |
| Y13-26 | <i>Bacillus tequilensis</i>         | 100%   | JF411301.1  | Elliker | + | N/A | N/A |
| Y13-27 | <i>Bacillus cereus</i>              | 100%   | MF662458.1  | Elliker | + | N/A | N/A |
| Y13-28 | <i>Bacillus kochii</i>              | 99.79% | MN075515.1  | Elliker | + | N/A | N/A |
| Y13-29 | <i>Bacillus licheniformis</i>       | 96.58% | MH261078.1  | Elliker | + | N/A | N/A |
| Y12-30 | <i>Bacillus amyloliquefaciens</i>   | 100%   | KY685066.1  | Elliker | + | N/A | N/A |
| Y11-31 | <i>Bacillus altitudinis</i>         | 100%   | KJ534473.1  | Elliker | + | N/A | N/A |
| Y11-32 | <i>Bacillus thuringiensis</i>       | 99.86% | MN594796.1  | Elliker | + | N/A | N/A |
| Y13-33 | <i>Lysinibacillus pakistanensis</i> | 95.03% | MN396729.1  | LB      | - | +   | +   |
| Y12-34 | <i>Bacillus licheniformis</i>       | 100%   | MN746177.1  | LB      | + | N/A | N/A |
| Y12-35 | <i>Bacillus pumilus</i>             | 99.86% | FJ237277.1  | LB      | + | N/A | N/A |
| Y11-36 | <i>Bacillus safensis</i>            | 100%   | HQ699512.1  | LB      | + | N/A | N/A |
| Y11-37 | <i>Bacillus coagulans</i>           | 96.77% | MT509777.1  | LB      | + | N/A | N/A |
| Y11-38 | <i>Virgibacillus halophilus</i>     | 99.59% | NR_041358.1 | LB      | - | +   | -   |
| Y13-39 | <i>Bacillus circulans</i>           | 99.79% | KM349200.1  | LB      | - | -   | N/A |
| Y13-40 | <i>Sporosarcina contaminans</i>     | 99.65% | NR_116955.1 | LB      | - | -   | N/A |
| Y11-41 | <i>Bacillus aryabhatai</i>          | 99.86% | KC764988.1  | Elliker | + | N/A | N/A |
| Y11-42 | <i>Bacillus megaterium</i>          | 99.93% | JF683607.1  | Elliker | + | N/A | N/A |
| Y11-43 | <i>Bacillus megaterium</i>          | 100%   | MF431758.1  | Elliker | - | -   | N/A |
| Y11-45 | <i>Bacillus oleronius</i>           | 99.79% | LC588627.1  | Elliker | + | N/A | N/A |
| Y12-47 | <i>Bacillus cereus</i>              | 99.86% | JN400121.1  | Elliker | + | N/A | N/A |
| Y12-48 | <i>Bacillus coagulans</i>           | 99.86% | MT505650.1  | Elliker | + | N/A | N/A |
| Y11-49 | <i>Bacillus altitudinis</i>         | 100%   | KJ534473.1  | Elliker | + | N/A | N/A |
| Y11-50 | <i>Paenibacillus lautus</i>         | 99.72% | LC588571.1  | LB      | - | +   | +   |
| Y13-51 | <i>Paenibacillus chibensis</i>      | 98.27% | MN421017.1  | LB      | - | +   | -   |
| Y11-53 | <i>Bacillus coagulans</i>           | 96.62% | MK685115.1  | MRS     | + | N/A | N/A |
| Y11-54 | <i>Bacillus coagulans</i>           | 97.50% | MH685469.1  | MRS     | + | N/A | N/A |
| Y11-55 | <i>Bacillus coagulans</i>           | 94.97% | MH685469.1  | MRS     | + | N/A | N/A |
| Y11-57 | <i>Bacillus circulans</i>           | 98.89% | FJ581445.1  | Elliker | + | N/A | N/A |
| X15-58 | <i>Bacillus velezensis</i>          | 100%   | MT611666.1  | LB      | - | +   | +   |
| X15-59 | <i>Bacillus subtilis</i>            | 100%   | KX960108.1  | LB      | + | N/A | N/A |
| X15-60 | <i>Bacillus velezensis</i>          | 99.79% | MN704466.1  | LB      | + | N/A | N/A |
| X14-61 | <i>Paenibacillus chitinolyticus</i> | 98.47% | MN704459.1  | LB      | - | +   | +   |
| X14-62 | <i>Bacillus licheniformis</i>       | 96.53% | KX784914.1  | LB      | - | N/A | N/A |
| X15-63 | <i>Bacillus oleronius</i>           | 99.93% | KY773585.1  | LB      | - | +   | +   |
| X15-64 | <i>Bacillus licheniformis</i>       | 99.65% | MH475938.1  | LB      | - | +   | +   |
| X14-65 | <i>Bacillus tequilensis</i>         | 100%   | MF077125.1  | LB      | + | N/A | N/A |
| X16-66 | <i>Bacillus ginsengihumi</i>        | 99.86% | NR_041378.1 | Elliker | - | +   | -   |
| X14-67 | <i>Bacillus pumilus</i>             | 100%   | MN581175.1  | LB      | + | N/A | N/A |
| X16-68 | <i>Lactobacillus curieae</i>        | 95.40% | LC521989.1  | MRS     | - | +   | -   |
| X16-69 | <i>Lactobacillus curieae</i>        | 95.49% | LC519995.1  | MRS     | - | +   | -   |

The plus sign indicates that the strain has this ability, while the minus sign indicates the opposite. N/A indicated that the strain was not tested in this term.
